# Supplementary material
Source: PubMed Central journal article supplement (PMC3682658)
Supplement: NIHMS464154-supplement-Supplement1.pdf [file NIHMS464154-supplement-Supplement1.pdf]

## Supplementary Appendix

This appendix has been provided by the authors to give readers additional information about their work.

Supplement to: Hussain M, Tangen CM, Berry DL, et al. Intermittent versus continuous androgen deprivation in prostate cancer. *N Engl J Med* 2013;368:1314-25. DOI: [10.1056/NEJMoa1212299](https://doi.org/10.1056/NEJMoa1212299)

## Supplementary Appendix

Supplement to: Hussain M, Tangen CM, Berry DL, et al. Intermittent versus Continuous Androgen Deprivation in Prostate Cancer

|                                                                                                                                                                      |        |
|----------------------------------------------------------------------------------------------------------------------------------------------------------------------|--------|
| <b>Table of Contents</b> .....                                                                                                                                       | page 1 |
| <b>Figure S1</b> S9346 Consort Diagram.....                                                                                                                          | page 2 |
| <b>Figure S2</b> QOL CONSORT Diagram .....                                                                                                                           | page 3 |
| <b>Supplementary Table S1</b> Adverse Event Categories Where at Least One Grade 4 Event was Reported During the Consolidation (Randomized) Portion of the Trial..... | page 4 |
| <b>Supplementary Table S2</b> Median Survival (95% Confidence Interval) in Years for Treatment Arm Within Each Subset .....                                          | page 5 |

**Figure S1. S9346 Consort Diagram**

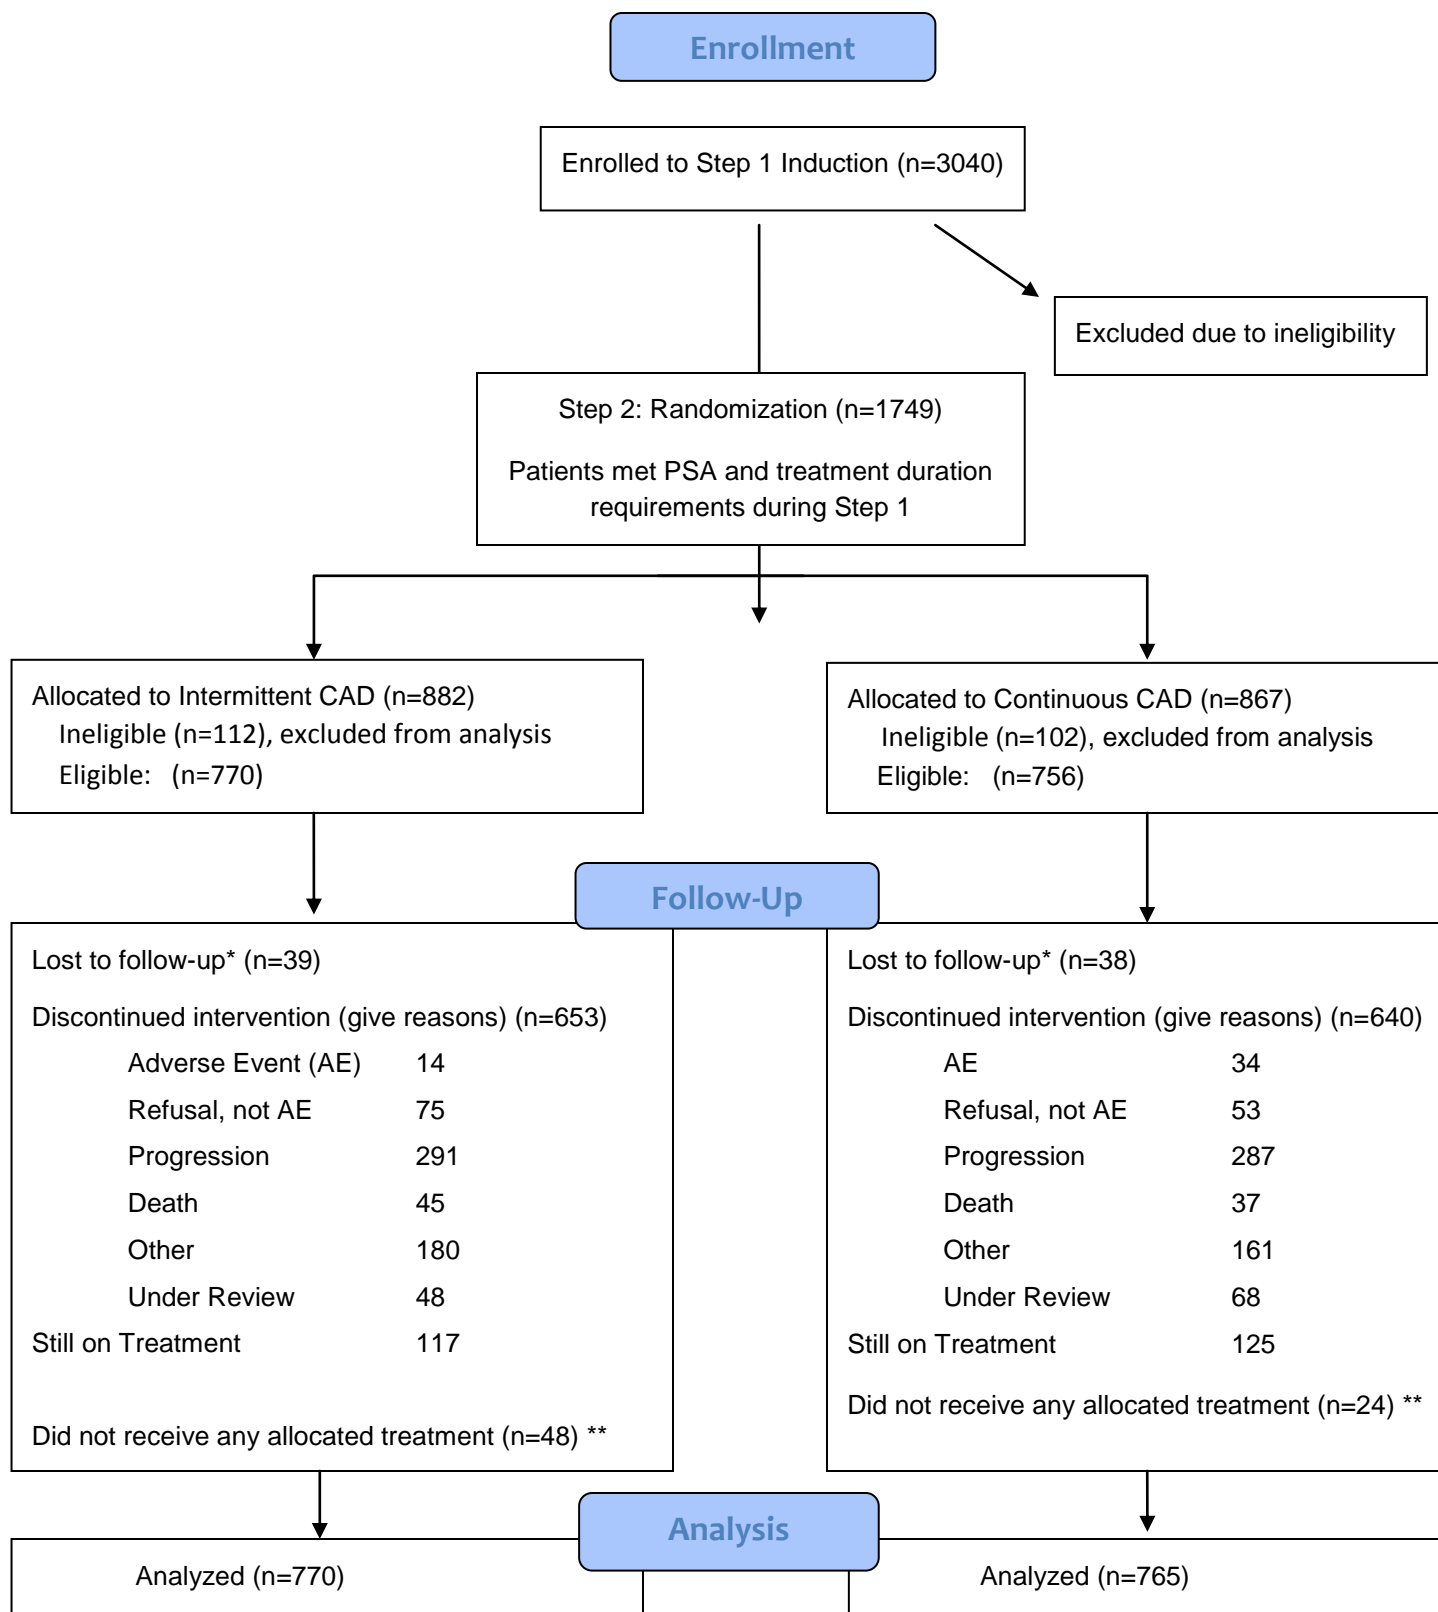

\* Lost to follow-up is defined as followed for less than 10 years, and last contact date was more than three years prior to date of final data analysis.

\*\*These patients are eligible and included in the intent-to-treat analysis

**Figure S2: QOL CONSORT Diagram**

**Induction Enrollment, Randomization and Follow up for S9346 QOL Sample**

**Step 1: Induction Enrollment**

Of 2950 eligible men at registration:

- Participant in QOL at registration (n=1340)
- Non-participant in QOL- EORTC Patients (n=596)
- Non-participant in QOL due to late induction registrations (n=936).
- Did not submit usable QOL form-set (n=78)

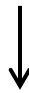

**• Step 2: Consolidation Randomization\***

- Of the 1535 eligible men randomized to step 2,
- QOL was expected on 1247 (615 CAD, 632 IAD):
- 1215 (97.4%; 595 CAD, 620 IAD) any usable form-set after registration
- 32 (2.6%; 20 CAD, 12 IAD) no usable form-sets after registration
- 1162 (93.2% 568 CAD, 594 IAD) usable form-set at randomization
- 995 (79.8%; 494 CAD, 501 IAD) usable form-set at 3 months
- 915 (73.4%; 438 CAD, 477 IAD) usable form-set at 9 months
- 826 (66.2%; 406 CAD, 420 IAD) usable form-set at 15 months

\*The quality of life results in this report are based on data from the randomized trial, not the induction enrollment phase.

**Table S1: Adverse Event Categories Where at Least One Grade 4 Event was Reported\* During the Consolidation (Randomized) Portion of the Trial**

|                          | <b>IAD (N=703)</b> |                | <b>CAD (N=731)</b> |                |
|--------------------------|--------------------|----------------|--------------------|----------------|
| <b>AE Category</b>       | <b>Grade 3</b>     | <b>Grade 4</b> | <b>Grade 3</b>     | <b>Grade 4</b> |
| Cardiovascular           | 8                  | 3              | 10                 | 5              |
| Flu-like Symptoms        | 18                 | 2              | 26                 | 2              |
| Gastrointestinal         | 4                  | 0              | 6                  | 3              |
| Hemorrhage               | 0                  | 1              | 3                  | 0              |
| Liver                    | 7                  | 0              | 3                  | 1              |
| Lung                     | 9                  | 2              | 12                 | 1              |
| Musculoskeletal          | 1                  | 1              | 2                  | 1              |
| Neurologic               | 15                 | 1              | 15                 | 2              |
| Pain                     | 26                 | 1              | 30                 | 2              |
| Renal/Bladder            | 11                 | 0              | 4                  | 1              |
| <b>Max Grade Any AE^</b> | <b>203</b>         | <b>11</b>      | <b>224</b>         | <b>15</b>      |

\* Treatment attribution: possible, probable, or definite, No Grade 5 reported

^ For all patients, including all AE categories.

**Table S2: Median Survival (95% Confidence Interval) in Years for Treatment Arm Within Each Subset**

| <b><u>Subset</u></b>          | <b><u>Median CAD</u></b> | <b><u>Median IAD</u></b> |
|-------------------------------|--------------------------|--------------------------|
| Extensive Disease             | 4.4 (3.9, 5.2)           | 4.9 (4.5, 5.5)           |
| Minimal Disease               | 6.9 (6.3, 7.5)           | 5.4 (4.8, 6.8)           |
|                               |                          |                          |
| Bone Pain                     | 4.7 (3.6, 6.5)           | 4.2 (3.6, 4.7)           |
| No Bone Pain                  | 6.0 (5.5, 6.8)           | 5.7 (5.1, 6.7)           |
|                               |                          |                          |
| PSA < 0.2 ng/ml               | 7.1 (6.3, 7.9)           | 6.5 (5.5, 7.1)           |
| PSA 0.2 - 4.0 ng/ml           | 3.5 (3.1, 4.0)           | 3.5 (3.1, 4.1)           |
|                               |                          |                          |
| Black                         | 6.7 (4.6, 8.2)           | 6.0 (4.4, 8.6)           |
| not Black                     | 5.9 (5.2, 6.8)           | 5.2 (4.8, 6.1)           |
|                               |                          |                          |
| PS 0-1                        | 5.8 (5.3, 6.5)           | 5.1 (4.8, 5.6)           |
| PS 2-3                        | 5.0 (2.2, 8.2)           | 4.0 (2.9, 6.9)           |
|                               |                          |                          |
| Prior hormones or finasteride | 6.6 (3.8, 7.7)           | 4.8 (3.7, 6.7)           |
| No Prior hormones             | 5.7 (5.2, 6.4)           | 5.1 (4.8, 5.7)           |
|                               |                          |                          |
| Europe                        | 5.3 (4.0, 6.2)           | 3.8 (3.1, 4.6)           |
| North America                 | 6.1 (5.3, 6.8)           | 5.3 (4.9, 6.1)           |
|                               |                          |                          |
| Overall                       | 5.8 (5.3, 6.5)           | 5.1 (4.8, 5.5)           |
